# Supplementary material for: Controlled fabrication of collagen-zinc phosphate hierarchical hybrid nanoflowers via a biomineralization process
Source: Royal Society of Chemistry journal article supplement (doi:10.1039/c8nj02215a), 2018-01-01
Supplement: c8nj02215a1.pdf [file c8nj02215a1.pdf]

## Supporting information

### Controlled fabrication of collagen-zinc phosphate hierarchical hybrid nanoflowers via biomineralization process

Jean Claude Munyemana , Huixia He, Shenglong Ding, Jie Yin, Pinxian Xi, Jianxi Xiao

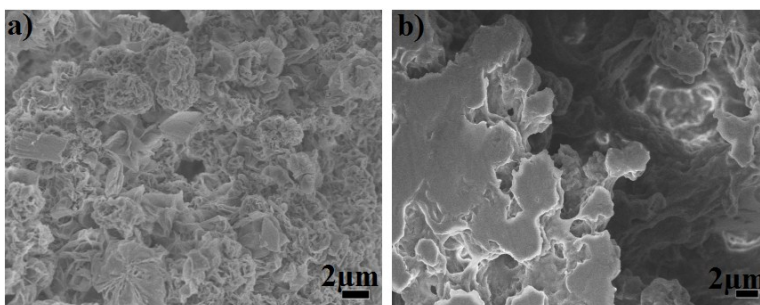

**Figure S1.** FESEM images of the synthesized CL-Zn<sub>3</sub>(PO<sub>4</sub>)<sub>2</sub> hybrid nanoflowers treated by calcination (a), and glutaraldehyde/ EDTA (b). Calcination was performed at 350 °C for 2 hrs. The CL-Zn<sub>3</sub>(PO<sub>4</sub>)<sub>2</sub> hybrid nanoflowers were first treated with glutaraldehyde (0.8 wt %) and then EDTA (1 wt %).
